# Supplementary material
Source: PubMed Central journal article supplement (PMC4880031)
Supplement: NIHMS784897-supplement-Supplemental_Figures.pdf [file NIHMS784897-supplement-Supplemental_Figures.pdf]

# Supplemental Figure 1

A. Representative image of the lymphoma tissue array staining.

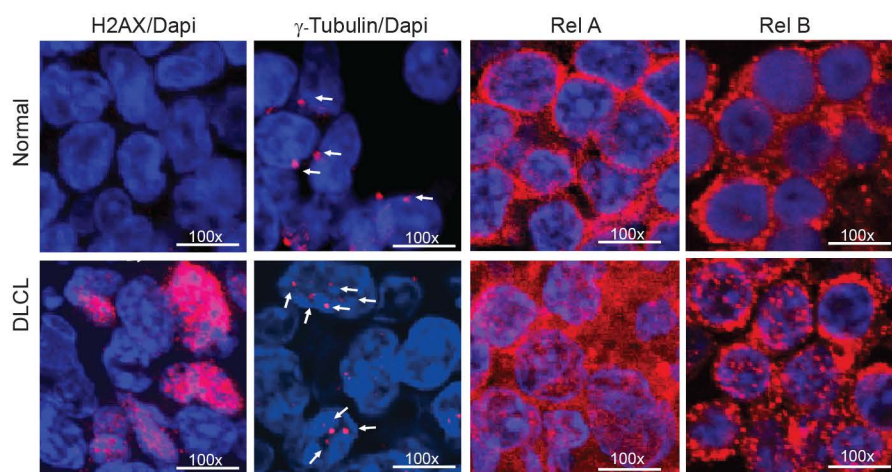

B. Steps performed for image processing. Outcome Nuclear and perinuclear regions.

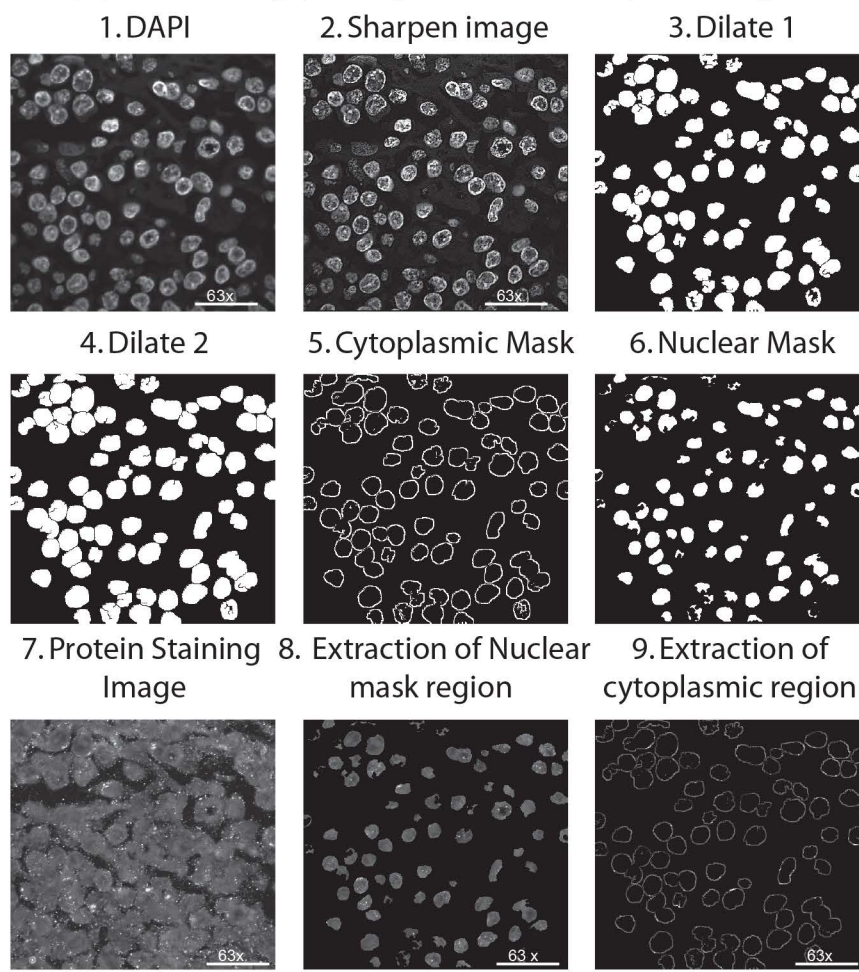

## Supplemental Figure 2.

### A.1. Supershift on shRNA OCI-LY3 expressing cells.

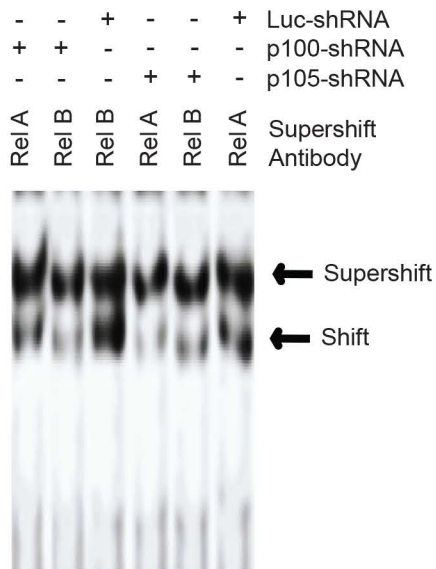

### A.2. Densitometry measurements of the gel retardation assay (A.1)

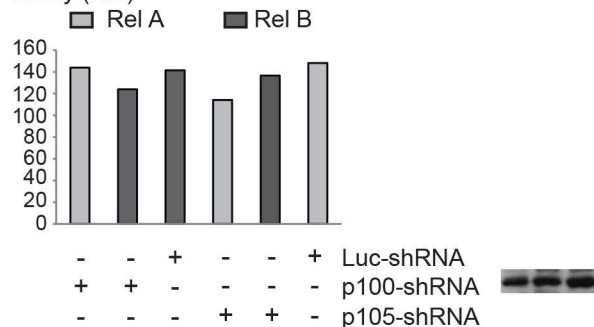

### A.3. p105 Knock down in OCI-LY3 and Daudi cell lines and

### A.4. p100 knock down in OCIL2 and SUDHL10

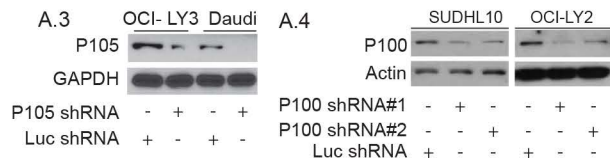

### B. $\gamma$ -H2AX(+) cells in cell lines with or without NF- $\kappa$ B activation.

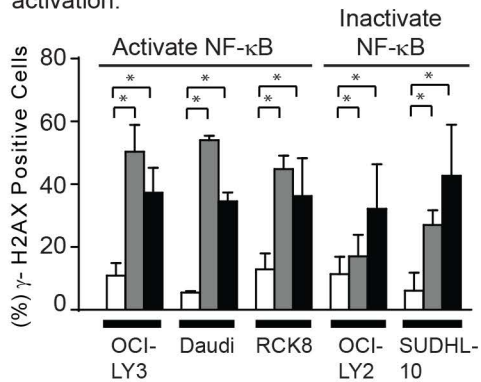

### C. Comet assay in cell lines with or without NF- $\kappa$ B activation

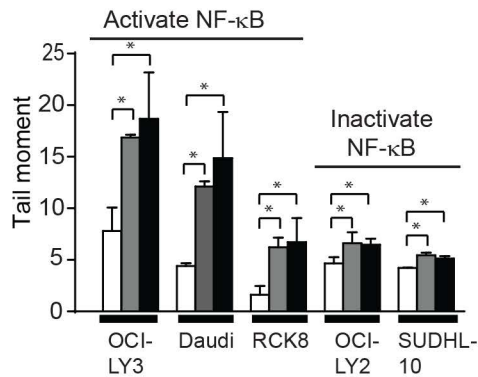

### Supplemental Figure 3

A. Centrosome numbers in cell lines with or without NF- $\kappa$ B activation

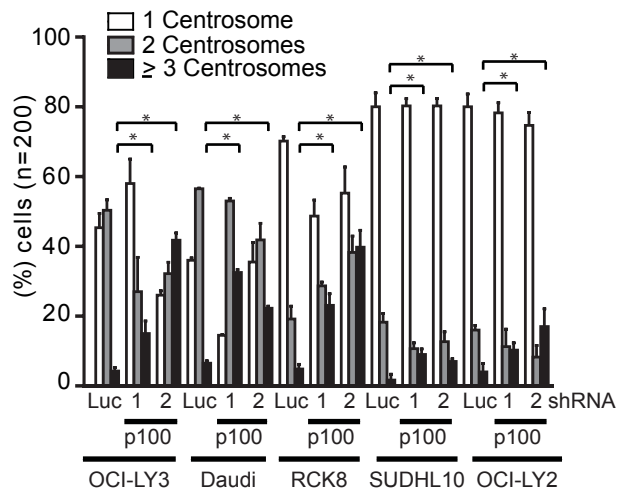

B. Centrosome numbers and colocalization with phospho-Aurora in p100- and Luciferase-shRNA expressing cells

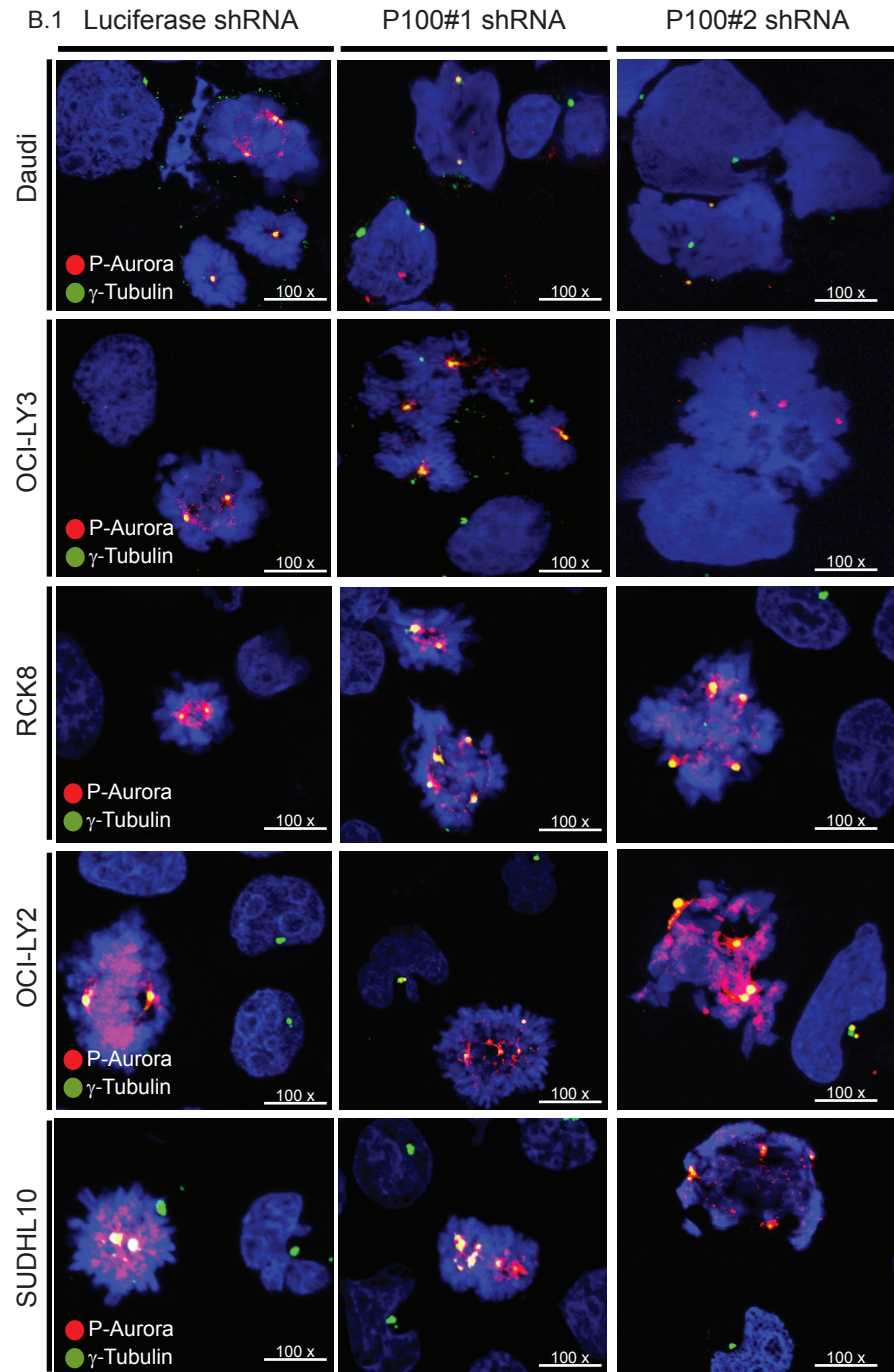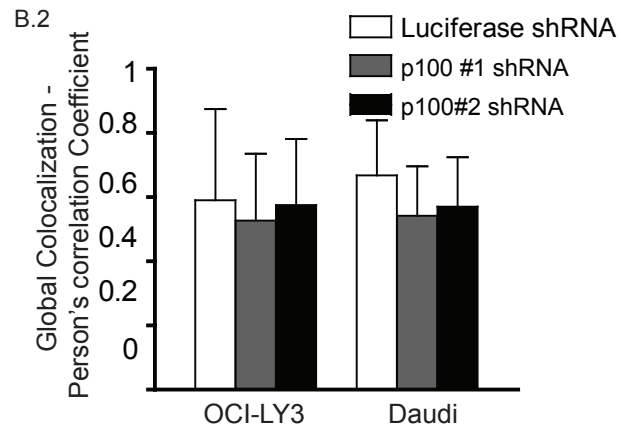

C.  $\gamma$ -H2AX(+) cells (C.1) and centrosome numbers (C.2) in OCI-LY3 Rel B-shRNA expressing cells

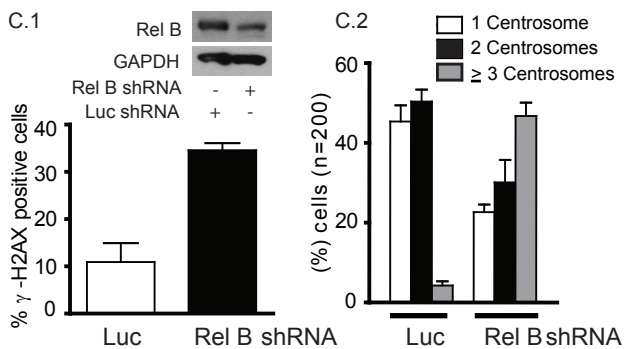

D. Rel B nuclear Localization after doxorubicin treatment in OCI-LY2 and SUDHL10 cells.

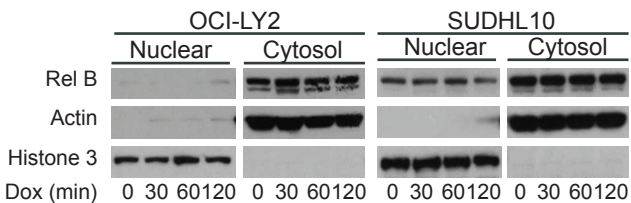



A. Representative images of Neutral comet assay representative images of p100- or Luciferase (Luc)-shRNA expressing cells after doxorubicin treatment.

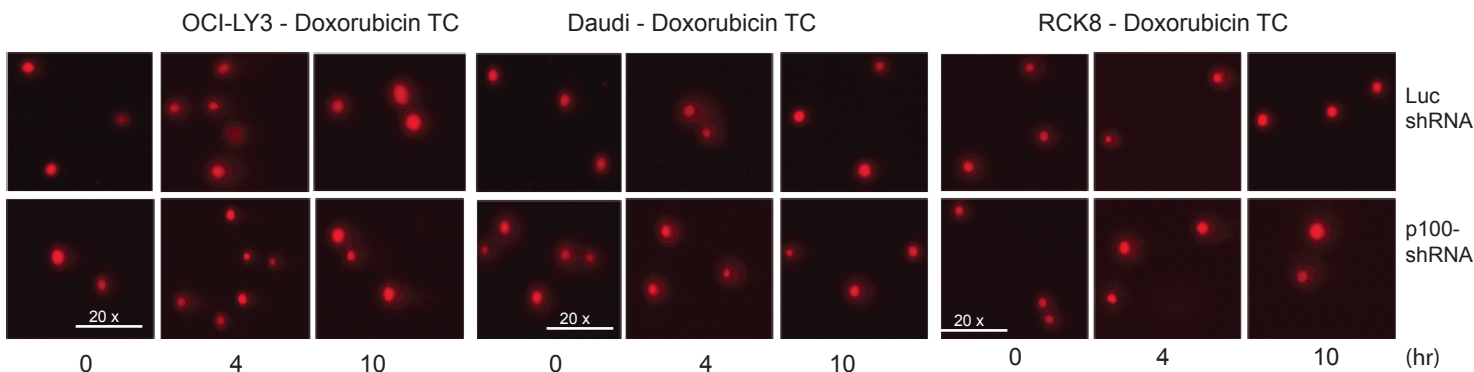

B. Representative images of  $\gamma$ H2AX (+) cells after doxorubicin treatment.

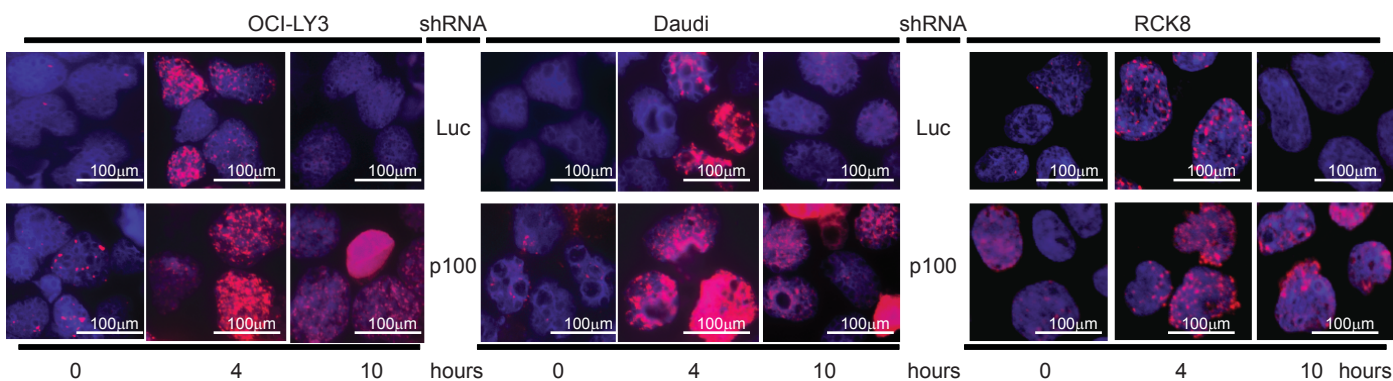

C.  $\gamma$ -H2AX (+) cell (%) during a time course after irradiation

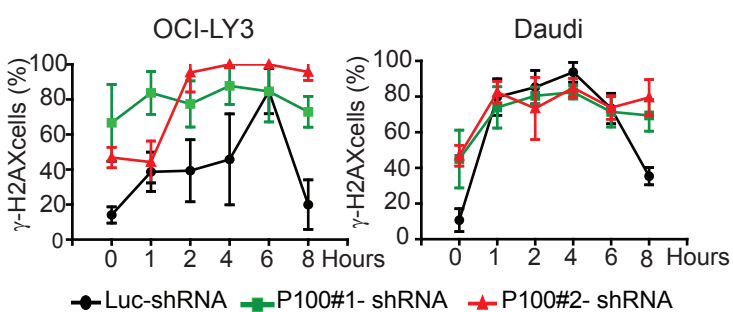

E. Neutral comet assay and percent of  $\gamma$ -H2AX (+) positive cells in p100 or Luciferase (Luc)-shRNA expressing OCI-LY2 and SUDHL10 cells after doxorubicin treatment.

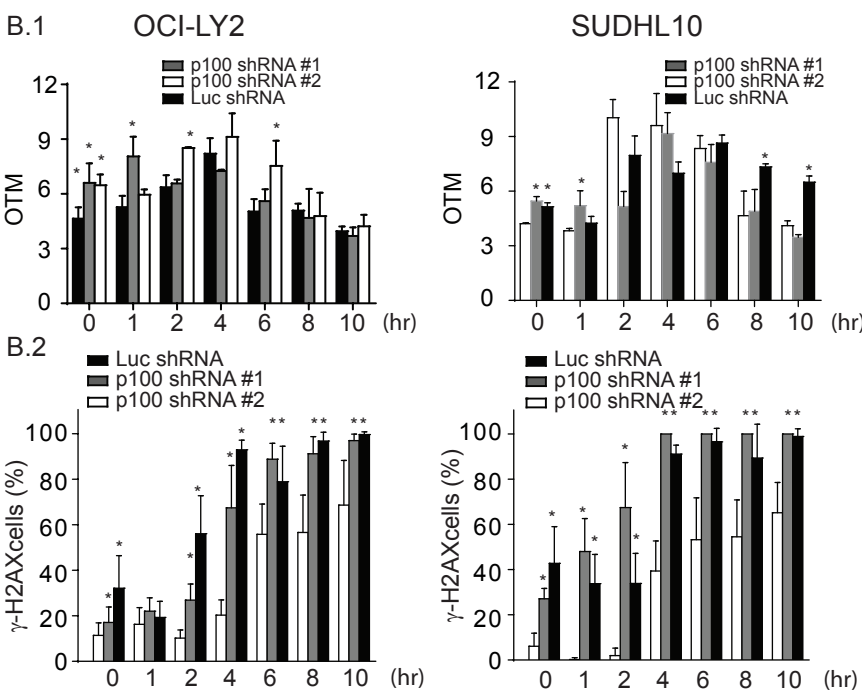

D. Level of apoptosis in p100- and Luciferase-shRNA expressing cells after 10 hours of doxorubicin treatment

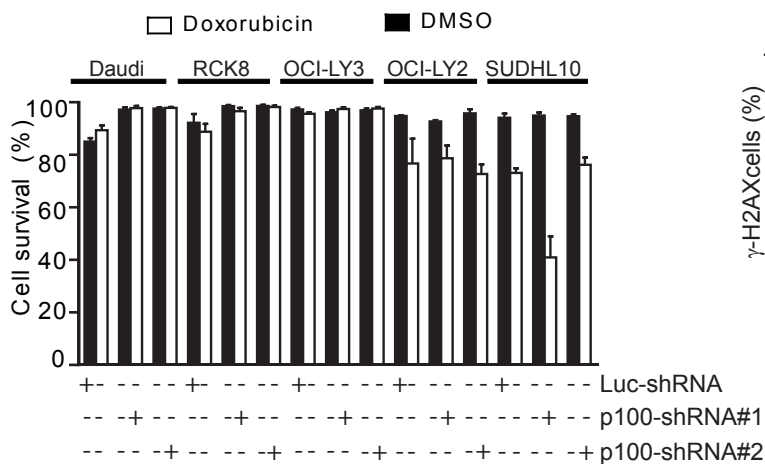

## Supplemental Figure 5

A. Level of knock down of p53 by p53 shRNA in OCY-LY-3 cells.

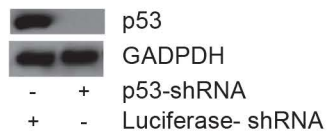

B. Luciferase- shRNA after 1 hour of treatment with doxorubicin.

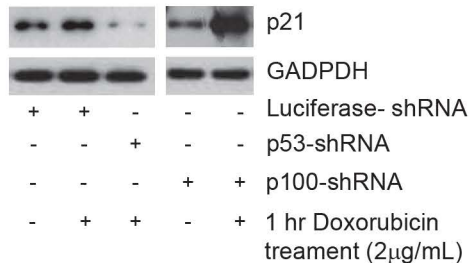

C. mRNA levels of GADD45a, REDD1 and CCNG2 during doxorubicin treatment in BJAB cells (p53 mutated).

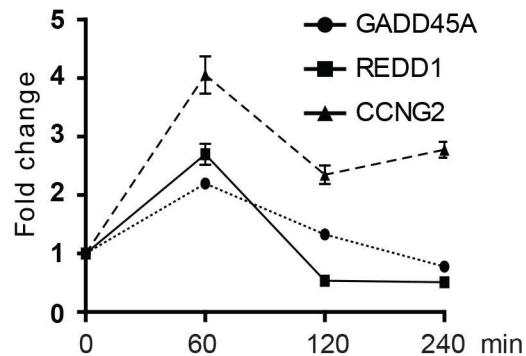

Supplemental Table 1A. Table of primers used for QPCR measurements

| Gene    | Forward primer             | Reverse primer        |
|---------|----------------------------|-----------------------|
| REDD1   | TGGGATCTTTGACACTTGAAAAATTA | TGCCAGCTCAACTCTGCAGTA |
| CCNG2   | GAGAGGCCATGTGGAGAGAGA      | CTGGGAGCTTAAGGCTGGAA  |
| GADD45A | TGCTCAGCAAAGCCCTGAGT       | GCTTGGCCGCTTCGTACA    |
| PCBP4   | ACCATGGCGGGTGTCACT         | AGGATGCAGTAGGCCAGGAA  |
| SFRS6   | GGTAAATGCCTGCACCCATAA      | GGCAAGGATAGGCCCTGACT  |

Supplemental Table 1C. Table of primers used for CHIP analysis

| Gene name    | Forward primer         | Reverse primer         |
|--------------|------------------------|------------------------|
| DDIT4 -1371  | TGGCTCACAACTATTCCATTC  | CCAAGCTCTGCACCCTACTC   |
| h DDIT4 -941 | CCAGGCCAGATTTCTGTG     | AGGACCGAGGACCGAGA      |
| h DDIT4 -639 | CACTCTCCTCAAGCCCTCTC   | CAGCCCAGGACATAGGTTAATG |
| DDIT4 -341   | CGTGTGTGCCAGTTGTTC     | TGACCAGGCTAGGAGGAGAG   |
| CCNG2-949    | CAACAGCACTACAACCTCTGGA | ACTGAAGGAGGGGCTTTTC    |
| CCNG2 FP-143 | CTTAGGGGCGGGACTCTTTT   | CGAGCCCCTTGTTTTTGTTA   |
| GADD45A -716 | GGGCAAGGCTCTTTGAGAA    | GGAAATCGTGAGCTGGTCTG   |
| GADD45A +518 | GCAGGGGAGGAAGCTAAAA    | GGGCACGCTCTTTCAGTC     |

Supplemental Table 1C. karyotype analysis of p100- and Luciferase-shRNA expressing cells

| CELL TYPE                | KARYOTYPE                                                                                                                                                                     |
|--------------------------|-------------------------------------------------------------------------------------------------------------------------------------------------------------------------------|
| OCI-LY3-Luciferase shRNA | 65~72, XYY,+X,der(1)t(1;17)(q12;q11.2),add(4)(q35)x2,add(5)(p15),-6, del(6)(q1q27)X2,add(7)(q32),+9,-10,-11,-17,-17,-18,?der(18)t(14;18),+19,add(19)(q13.4)x2,-22,+6mar[cp15] |
| OCI-LY3-P100 shRNA #1    | 44~45,X,-Y,del(3)(q12q23),inv(4)(p12q21),t(8;14)(q24;q32),inv(9)(q22q34.1),del(11)(q23q25),del(12)(p11.2p11.2),-13,add(16)(p13.3),add(17)(p11.2),add(18)(q21),+mar[cp8]       |
| OCI-LY3- P100 shRNA #2   | 49,XY,add(2)(p13),-3,add(3)(p23),?del(4pter),+7,add(8)(q24.3),?+add(12)(q21),+13,?add(13)(q32),t(14;18)(q24;q32),-18,+2mar[cp7]                                               |
| Daudi-Luciferase shRNA   | 46,XY,t(8;14)(q24;q32)[10]                                                                                                                                                    |
| Daudi-P100 shRNA #1      | 48,XY,?add(2)(p13),-3, add(3)(p23),+7, add(8)(q24.3),?+add(12)(q21),+13,?add(13)(q32),t(14;18)(q32;q21),-18,-22,+2mar[cp6]                                                    |
| Daudi-P100 shRNA #2      | 48,-3, add(3)(p23),t(14;18)(q32;q21),inc[cp8]                                                                                                                                 |
| RCK8-Luciferase shRNA    | 43~46,XY,add(1)(q21),-2,-3,add(5)(p12),del(6)(q21q27),add(7)(q22),add(10)(q24),add(11)(q23),del(18)(q21q23),                                                                  |
| RCK8-P100 shRNA #1       | 45-48,XY,add(2)(p13),-3, add(3)(p23),+7,?+add(12)(q21),t(14;18)(q32;q21), inc[cp5]                                                                                            |
| RCK8-P100 shRNA #2       | 48,XY,add(2)(p13),add(3)(p23),+7, add(8)(q24.3),?+add(12)(q21),+13,?add(13)(q32),t(14;18)(q32;q21), inc[cp10]                                                                 |

Supplemental Table 1D. Table of genes involved in DNA repair and centrosome duplication that were confirmed by QPCR.

| p100 regulated gene | Gene name                                                  | p100 shRNA/<br>Luc shRNA |
|---------------------|------------------------------------------------------------|--------------------------|
| REDD1               | Protein regulated in development and DNA damage response 1 | 0.22 ± 0.11              |
| CCNG2               | Cyclin G2                                                  | 0.20 ± 0.06              |
| GADD45A             | Growth arrest DNA-damage-inducible, alpha                  | 0.17 ± 0.08              |
| PCBP4               | Poly(rC) binding protein 4                                 | 0.50 ± 0.09              |
| SFRS6               | Splicing factor, arginine/serine-rich 6                    | 1.98 ± 0.28              |

## **Supplemental Methods**

### **Primary tumor sample immunofluorescence studies.**

Retrospective deidentified diagnostic tumor samples were obtained from the Stanford University School of Medicine hematology tissue acquisition and procurement bank program. The use of human tissue was approved by the research ethics board of Stanford University and Emory University. Two independent pathologists confirmed the pathological diagnosis of all samples. When possible, tumor samples were identified as activated B-cell (n=14) and germinal center (n=30) diffuse large cell lymphoma using the Hans' protocol <sup>1</sup>. Ninety-two 0.5-mm cores from diagnostic areas of each DLBCL sample were used to generate a single-recipient paraffin block using a tissue arrayer (Beecher Instruments, Silver Spring, Maryland). Briefly, five-micron sections were deparaffinized by incubating in an 80°C water bath three times for 20-minutes followed by three 5-minute incubations in xylene and a series of ethanol solutions (100%, 90%, 75% and 50%). After washing with distilled water, antigen retrieval was performed by immersing the slides in microwave solution (9 ml of 0.01M citric acid, 41 ml of 0.01 mM sodium citrate and 450 ml of water) and microwaving at low power three times for 5-minutes. Slides were pre-treated with blocking solution (10% goat serum/3% BSA/0.5% gelatin/PBS) for 1 hour to block non-specific binding sites. Primary antibodies were applied at 1:250 dilution in 50 mM Tris-Cl (pH 7.4) with 3% goat serum overnight. After washing, secondary Alexa Fluor 488-conjugated antibodies (Molecular Probes) were applied for 1 hour. After further washing, slides were counter stained with DAPI for nuclear detection.

1. Hans CP, Weisenburger DD, Greiner TC, et al. Confirmation of the molecular classification of diffuse large B-cell lymphoma by immunohistochemistry using a tissue microarray. *Blood* 2004;103:275-82.
